# Supplementary material for: Antimicrobial Activities and Mechanisms of Magnesium Oxide Nanoparticles (nMgO) against Pathogenic Bacteria, Yeasts, and Biofilms
Source: PubMed Central journal article supplement (PMC6214931; doi:10.1038/s41598-018-34567-5), 2018-11-02
Supplement: 41598_2018_34567_MOESM1_ESM.pdf [file 41598_2018_34567_MOESM1_ESM.pdf]

Antimicrobial Activities and Mechanisms of Magnesium Oxide Nanoparticles (nMgO) against  
Pathogenic Bacteria, Yeasts, and Biofilms

Authors: Nhu-Y Thi Nguyen<sup>1</sup>, Nathaniel Grelling<sup>2</sup>, Cheyann Lee Wetteland<sup>2</sup>, Romeo Rosario<sup>2</sup>,  
Huinan Liu<sup>1,2,3\*</sup>

Affiliations: <sup>1</sup>Microbiology Program, <sup>2</sup>Department of Bioengineering, <sup>3</sup>Materials Science and  
Engineering Program, University of California, Riverside, CA 92521. U.S.A.

\*Corresponding Author:

Huinan Liu, PhD  
Associate Professor  
Department of Bioengineering  
Materials Science and Engineering Program  
Microbiology Program  
University of California at Riverside  
900 University Avenue  
Riverside, CA 92521  
Phone: 951 827 2944  
Fax: 951 827 6416  
Email: [huinan.liu@ucr.edu](mailto:huinan.liu@ucr.edu)

## Supplementary Materials

### **Ca<sup>2+</sup> ion concentrations showed interesting correlations with the nMgO concentrations, the supplemental Mg<sup>2+</sup> ion dosages, and the CFUs of bacteria and yeasts**

Ca<sup>2+</sup> ions might have played a role in the observed death of bacteria and yeasts. In general, the correlation between the CFU of bacteria and the Ca<sup>2+</sup> ion concentration showed a shape of “x”; that is, at the concentration of nMgO where the CFUs of bacteria decreased, there was an increase in Ca<sup>2+</sup> ion concentrations in broth (Figures S1 and S2). For *E. coli*, interestingly, Ca<sup>2+</sup> ion concentration did not change much at 1.0-2.0 mg/mL of nMgO, possibly because the CFU of *E. coli* reached zero as the amount of nMgO increased to 1.0-2.0 mg/mL (Figure S1). When *S. epidermidis* were cultured in the broth with initial pH intentionally adjust to alkaline region, the Mg<sup>2+</sup> ion concentration in the broth remained constant and bacterial viability was not affected, but the Ca<sup>2+</sup> ion concentration slightly decreased as the pH increased (Figure S3). In the doped Mg<sup>2+</sup> ion study, the viability of *S. epidermidis* was not affected, and the Ca<sup>2+</sup> concentrations increased as the Mg<sup>2+</sup> increased. These correlations suggested that both the pH and Mg<sup>2+</sup> ions might have played a role on the soluble Ca<sup>2+</sup> ion concentrations in the broths; and the effects of Mg<sup>2+</sup> was more pronounced than that of pH.

In contrast, the yeasts seem to have a general positive correlation between Ca<sup>2+</sup> ions and the CFU with a shape similar to a spoon (Figure S4). When the CFUs of yeasts decreased, the Ca<sup>2+</sup> ion concentration also decreased; and at 2.0 mg/mL of nMgO, the CFUs increased and the Ca<sup>2+</sup> ion concentration also had a spike. For *C. albicans*, however, the correlation showed some exceptions at 1.2 and 1.4 mg/mL of nMgO. To our knowledge, these correlations have not been previously reported in literature and further research is needed to fully understand these correlations.

### Supplementary Figures:

**Figure S1:** The correlation between the concentrations of soluble  $\text{Ca}^{2+}$  ions in the broth and CFUs for gram-negative bacteria, including *E. coli* and *P. aeruginosa*.

**Figure S2:** The correlation between the concentrations of soluble  $\text{Ca}^{2+}$  ions in the broth and CFUs for gram-positive bacteria, including *S. epidermidis*, *S. aureus* and *MRSA*.

**Figure S3:** The correlation between the concentrations of soluble  $\text{Ca}^{2+}$  ions in the broth and CFUs for *S. epidermidis* from (A) the pH study and (B) the  $\text{Mg}^{2+}$  doping study.

**Figure S4:** The correlation between the concentrations of soluble  $\text{Ca}^{2+}$  ions in the broth and CFUs for yeast strains, including *C. albicans*, *C. albicans FR*, *C. glabrata*, and *C. glabrata ER*.

## Supplementary Figures

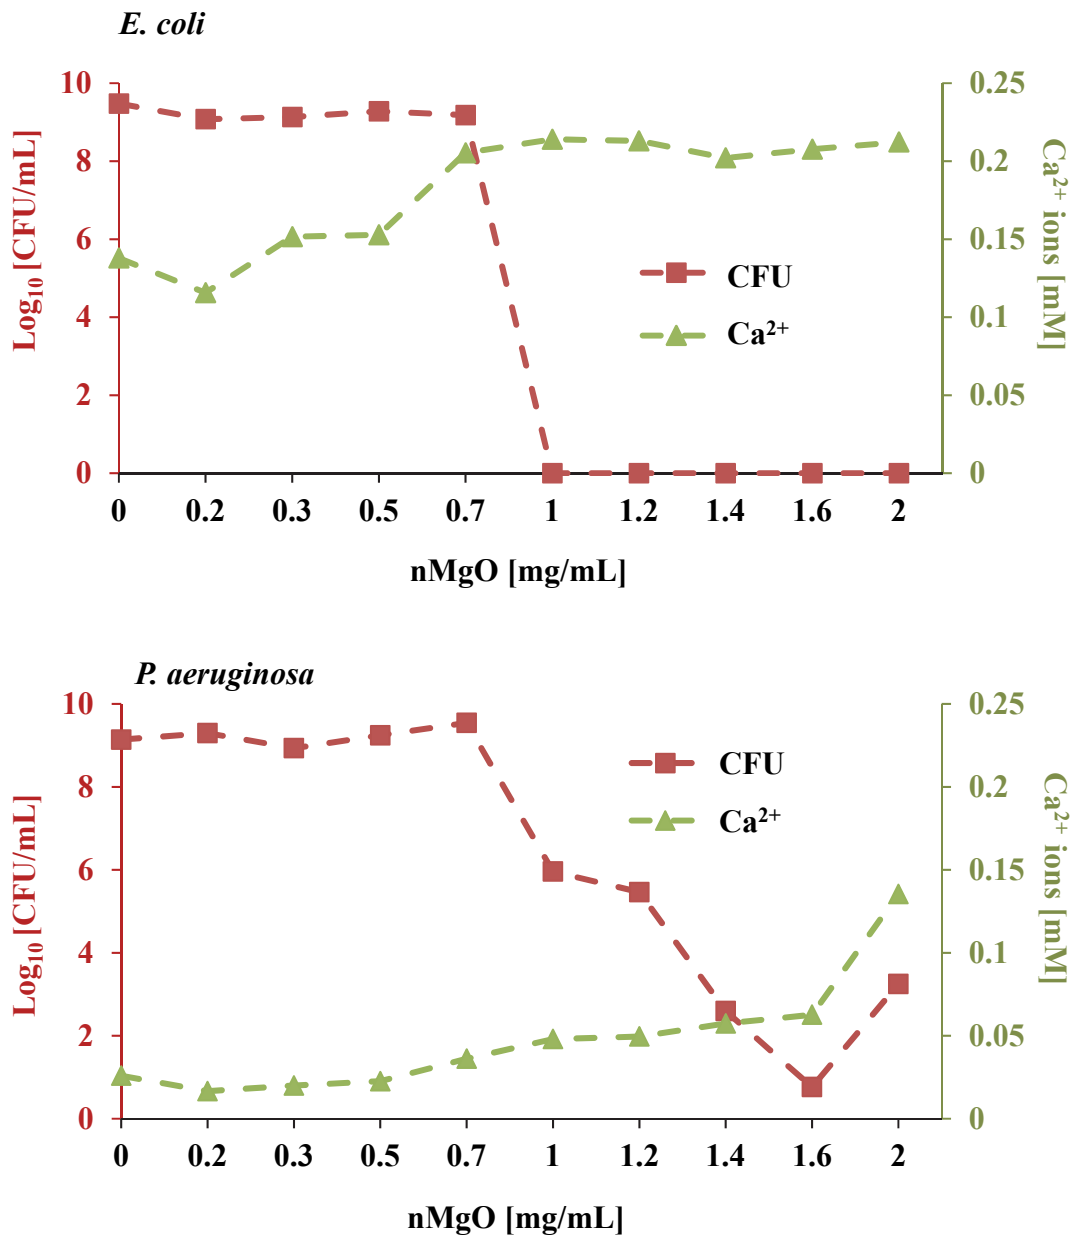

**Figure S1:** The correlation between the concentrations of soluble Ca<sup>2+</sup> ions in the broth and CFUs for gram-negative bacteria, including *E. coli* and *P. aeruginosa*.

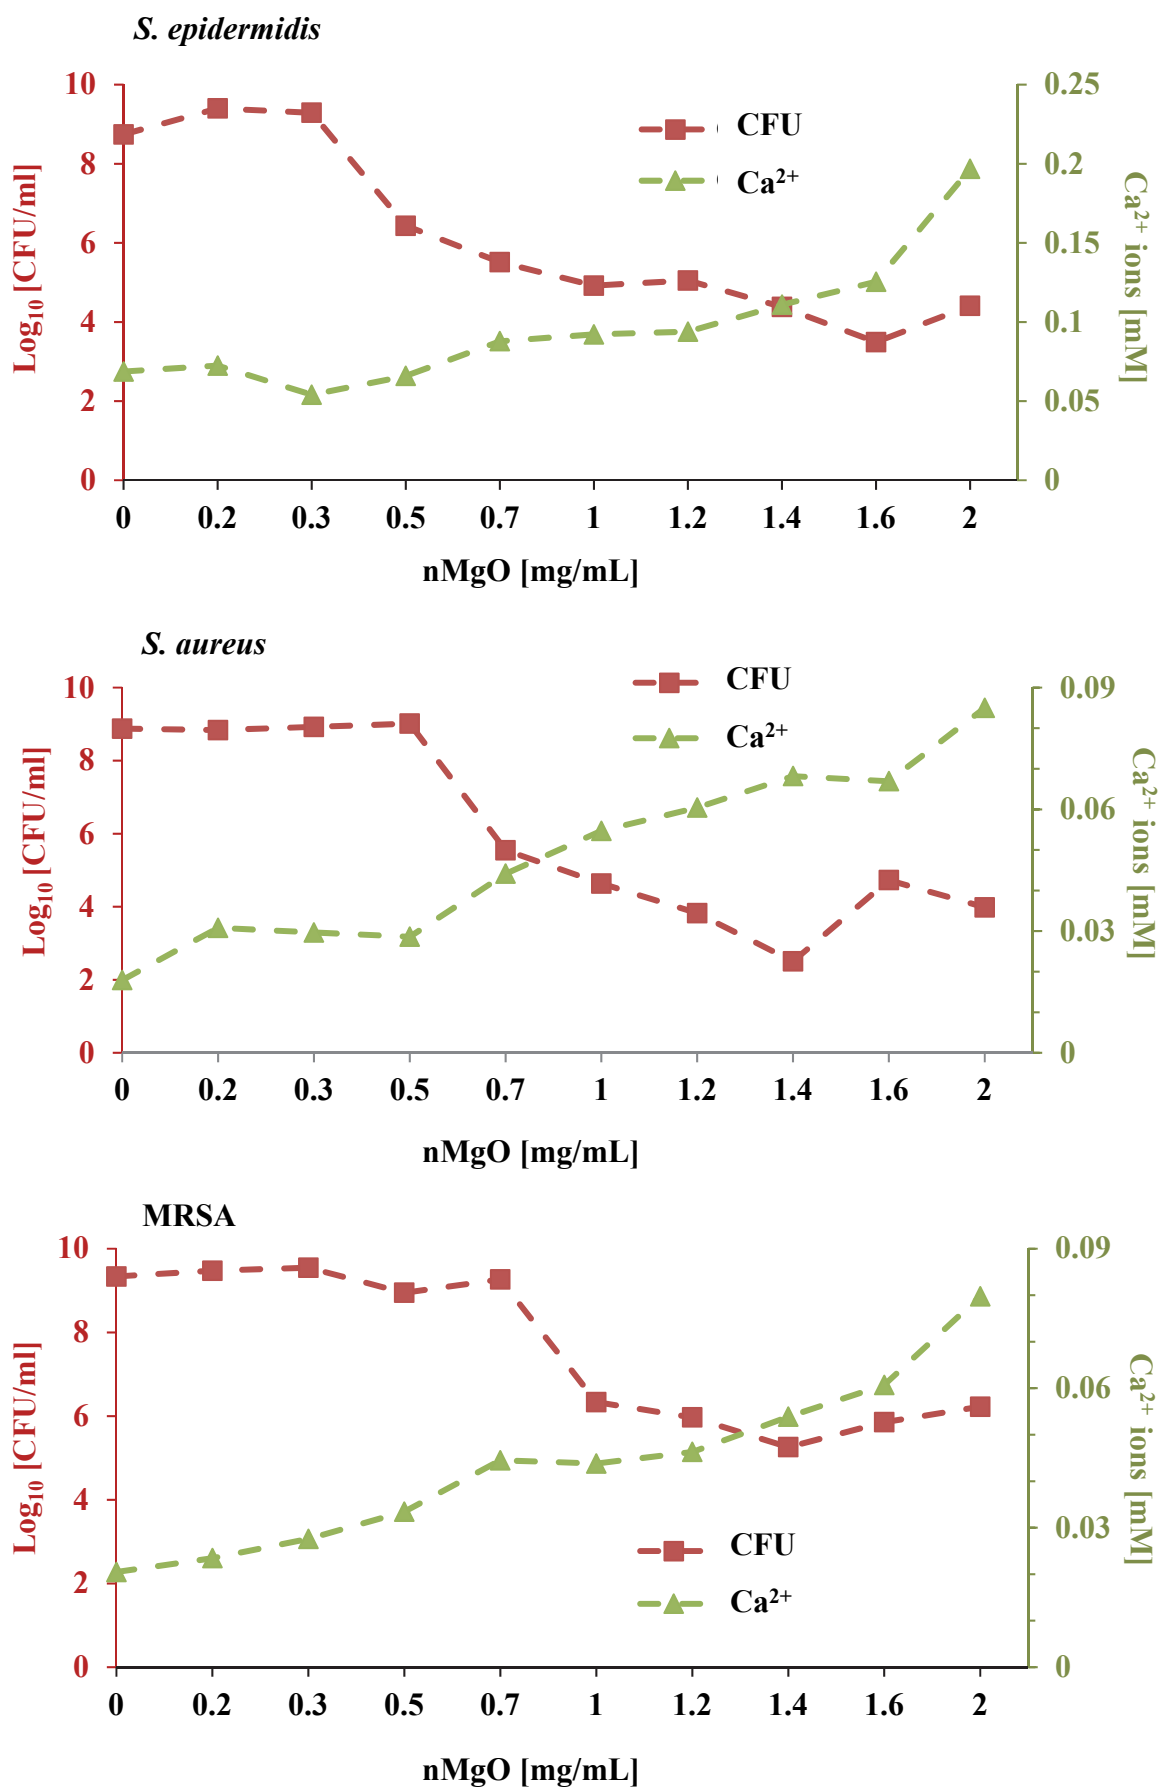

**Figure S2:** The correlation between the concentrations of soluble Ca<sup>2+</sup> ions in the broth and CFUs for gram-positive bacteria, including *S. epidermidis*, *S. aureus* and MRSA.

*S. epidermidis*

A

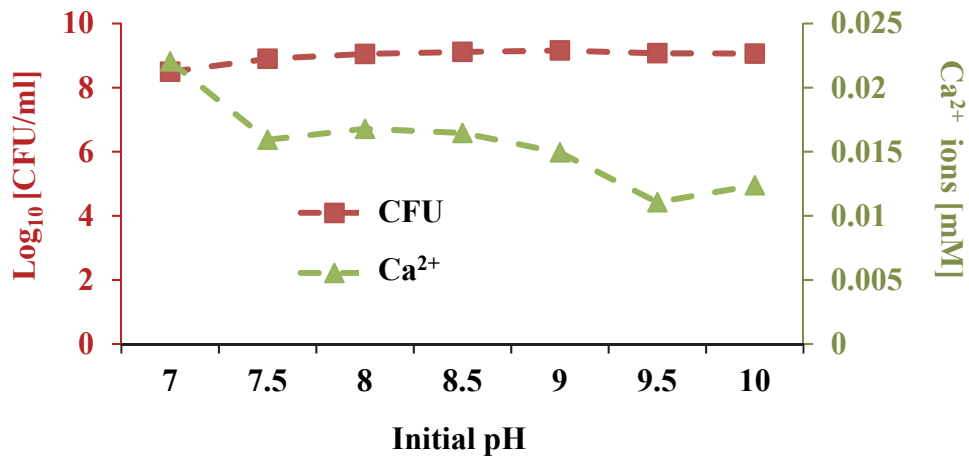

B

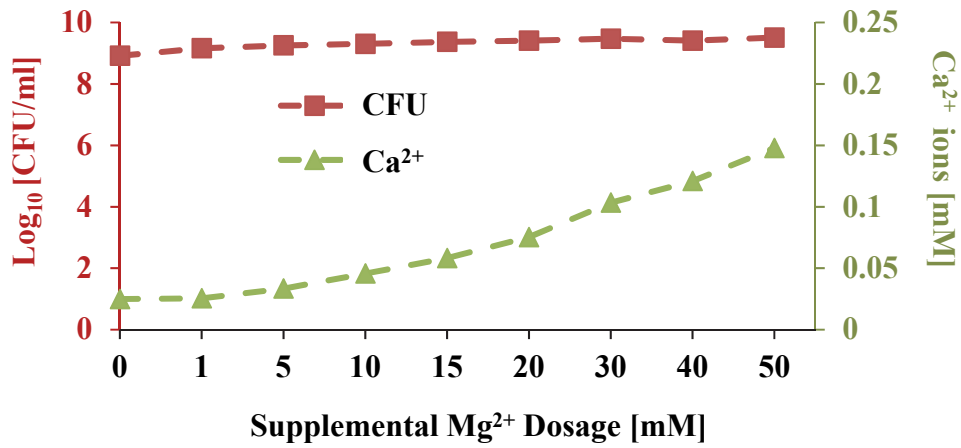

**Figure S3:** The correlation between the concentrations of soluble Ca<sup>2+</sup> ions in the broth and CFUs for *S. epidermidis* from (A) the pH study and (B) the Mg<sup>2+</sup> doping study.

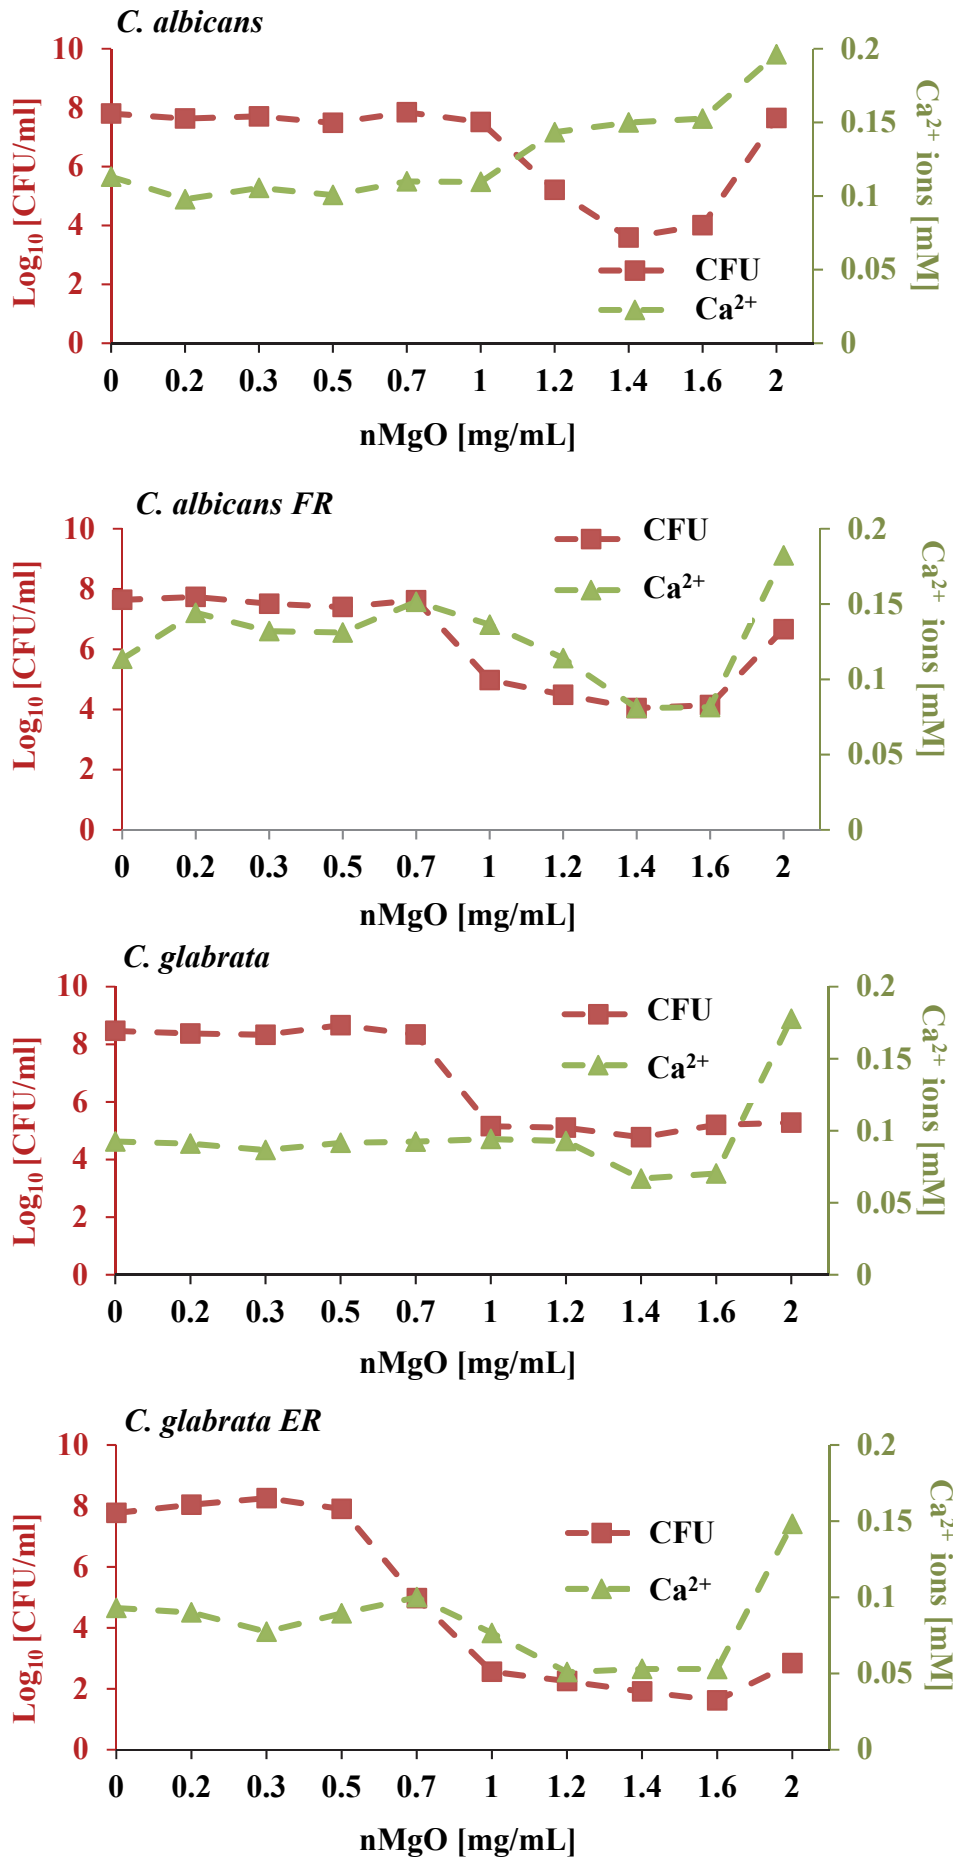

**Figure S4:** The correlation between the concentrations of soluble  $\text{Ca}^{2+}$  ions in the broth and CFUs for yeast strains, including *C. albicans*, *C. albicans FR*, *C. glabrata*, and *C. glabrata ER*.
